# Supplementary material for: Feasibility study of using high-throughput drug sensitivity testing to target recurrent glioblastoma stem cells for individualized treatment
Source: PubMed Central journal article supplement (PMC6937360; doi:10.1186/s40169-019-0253-6), 2019-12-30

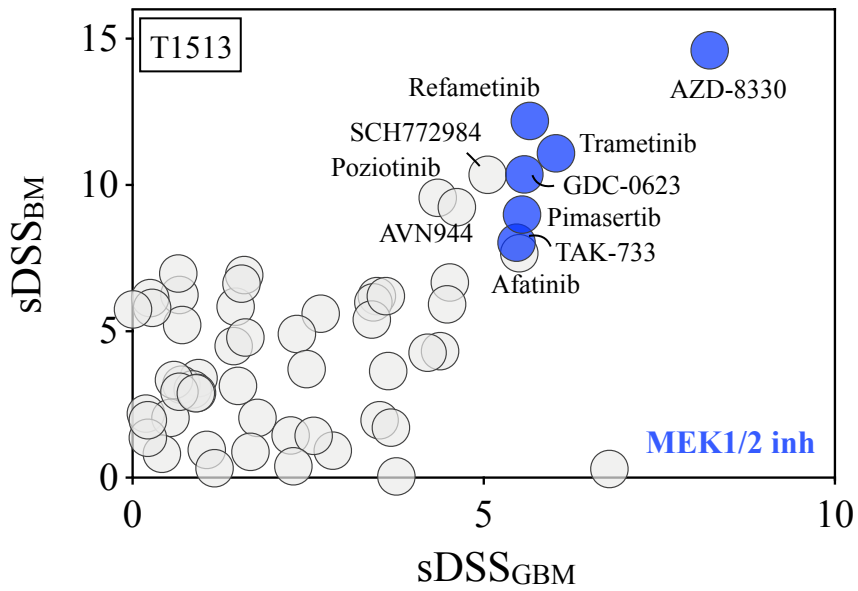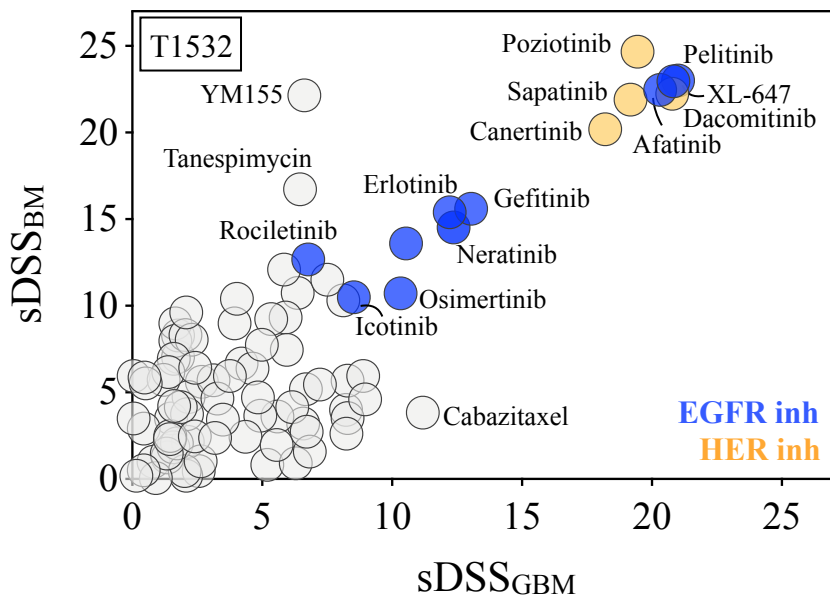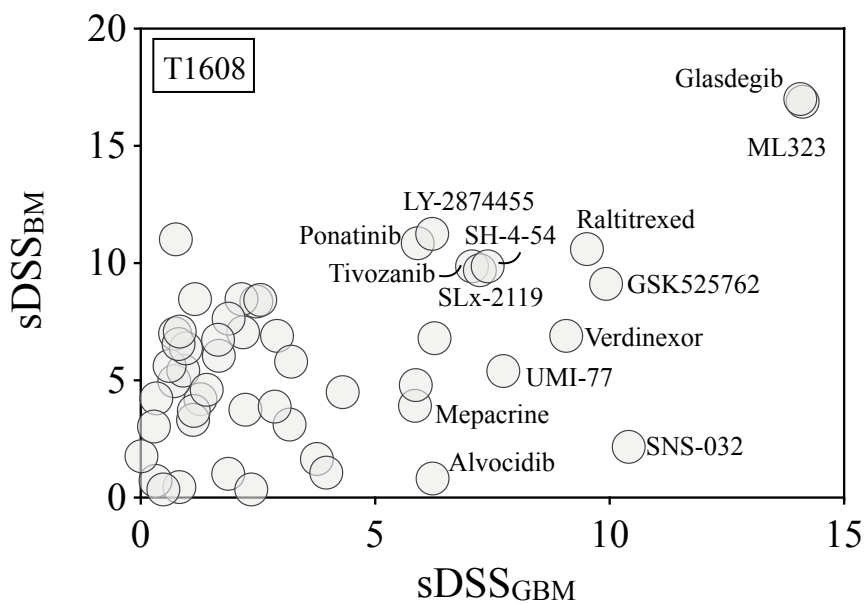

Supplement: 40169_2019_253_MOESM9_ESM.pdf [file 40169_2019_253_MOESM9_ESM.pdf]
